# Supplementary material for: Enhanced efficiency and stability of scalable spray-coated perovskite solar cells with ionic liquid additives
Source: Royal Society of Chemistry journal article supplement (doi:10.1039/d2se01043g), 2022-01-01
Supplement: d2se01043g1.pdf [file d2se01043g1.pdf]

## Supplementary data

### Enhanced Efficiency and Stability of Scalable Spray-coated Perovskite Solar Cells with Ionic liquid Additives

Shun-Hsiang Yang,<sup>a†</sup> Chia-Hao Tsai,<sup>b†</sup> Xiao-Feng Wang,<sup>c</sup> Tai-Chou Lee,<sup>a</sup> and Cheng-Liang Liu<sup>\*b</sup>

<sup>a</sup> *Department of Chemical and Materials Engineering, National Central University, Taoyuan 32001, Taiwan. Email: liucl@ntu.edu.tw*

<sup>b</sup> *Department of Materials Science and Engineering, National Taiwan University, Taipei 10617, Taiwan*

<sup>c</sup> *Key Laboratory of Physics and Technology for Advanced Batteries (Ministry of Education) College of Physics, Jilin University, Changchun 130012, China*

† The authors contributed to this work equally.

## **S.1 Instrumentation**

X-ray diffraction (XRD) analyzes were performed on a Bruker D8 Advance diffractometer (CuK $\alpha$ ,  $\lambda = 1.54 \text{ \AA}$ ). Field-emission scanning electron microscopy (FESEM) images were obtained using a JSM-7600F instrument (JEOL). UV–Vis absorption spectra of all samples were recorded on A JASCO V-670 spectrophotometer. Steady-state photoluminescence (PL) and time-resolved photoluminescence (TRPL) spectrometers were measured using a Horiba Jobin Yvon FluoroLog-3 fluorimeter. The valance band levels for the perovskite have been conducted using a Riken Keiki AC-2 photoelectron spectroscopy in the air (PESA) spectrometer.

**Table. S1.** PL lifetime obtained from fitted TRPL decay and the average lifetime of the perovskite film with and without BMIMBF<sub>4</sub> additive. The molar concentration of BMIMBF<sub>4</sub> is 0.30 mol% (champion device).

|                         | $\tau_1$ (ns) | $\tau_2$ (ns) | $\tau_{avg}$ (ns) |
|-------------------------|---------------|---------------|-------------------|
| w/o BMIMBF <sub>4</sub> | 5.79          | 37.80         | 8.39              |
| w/ BMIMBF <sub>4</sub>  | 6.99          | 44.13         | 18.39             |

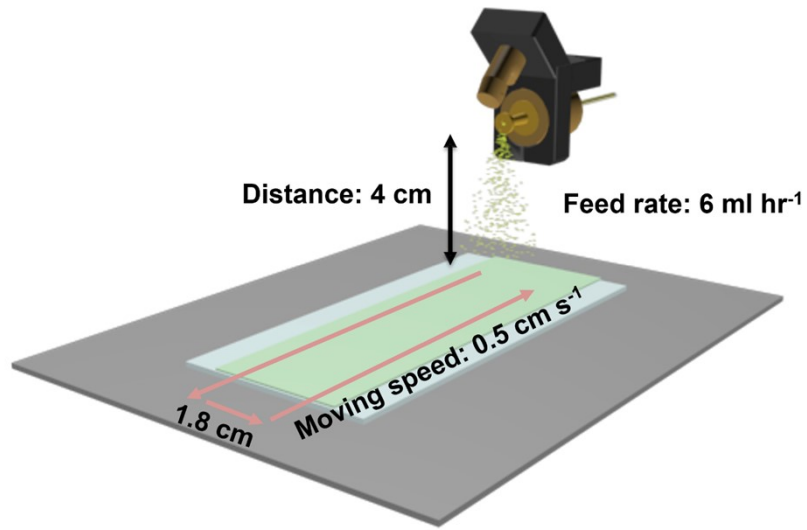

**Fig. S1** Schematic illustration of large area coating of perovskite film.

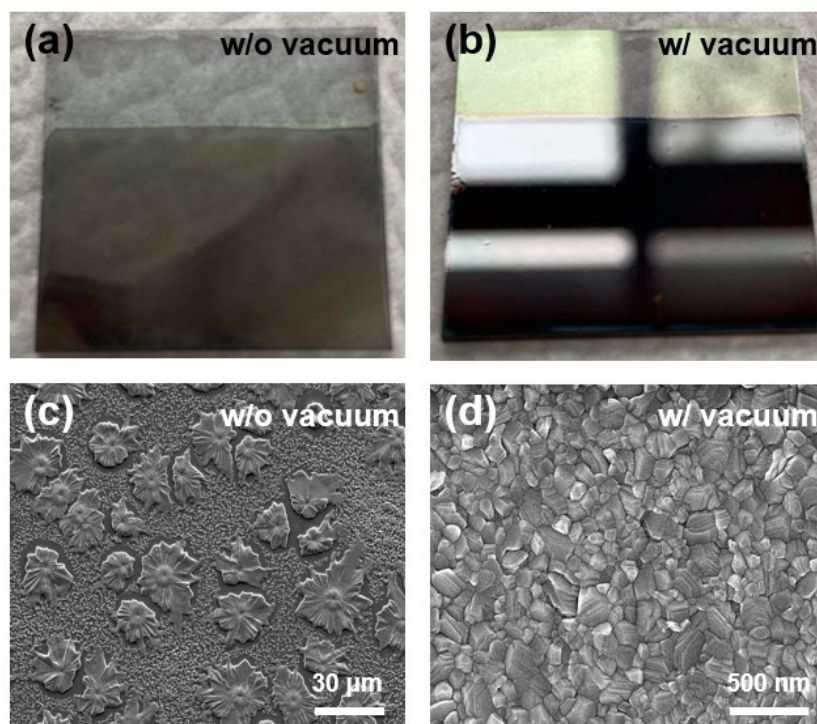

**Fig. S2** (a, b) Photographs and (c, d) plane SEM images of perovskite film without (a, c) and with (b, d) vacuum extraction.

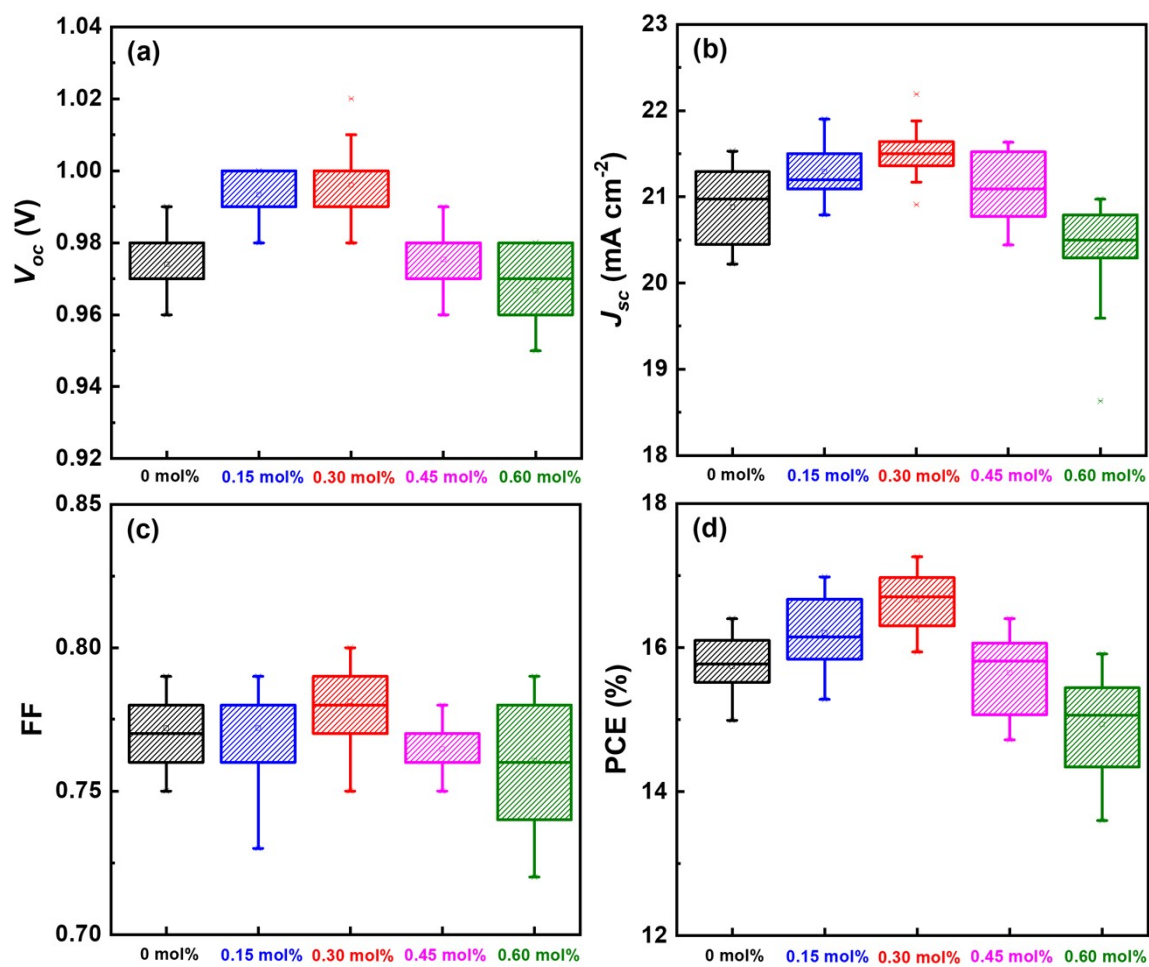

**Fig. S3** Statistics of (a)  $V_{oc}$ , (b)  $J_{sc}$ , (c) FF, and (d) PCE of perovskite solar devices with different molar ratios BMIMBF<sub>4</sub> additive. The statistical data were obtained from 15 cells for each molar ratio.

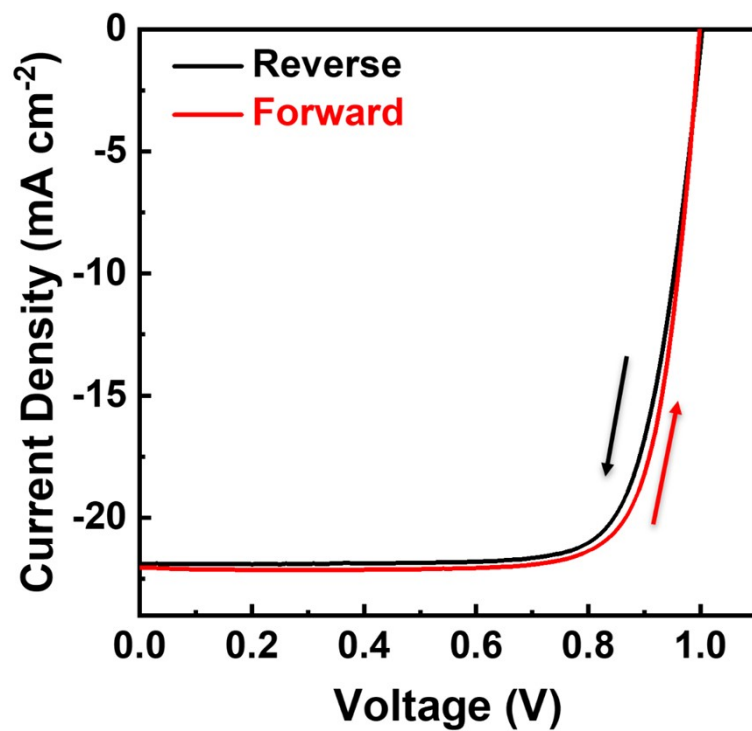

**Fig. S4** *J-V* characteristics under AM 1.5G illumination for best-performing perovskite solar cells with 0.30 mol% BMIMBF<sub>4</sub> under forward and reverse scan.

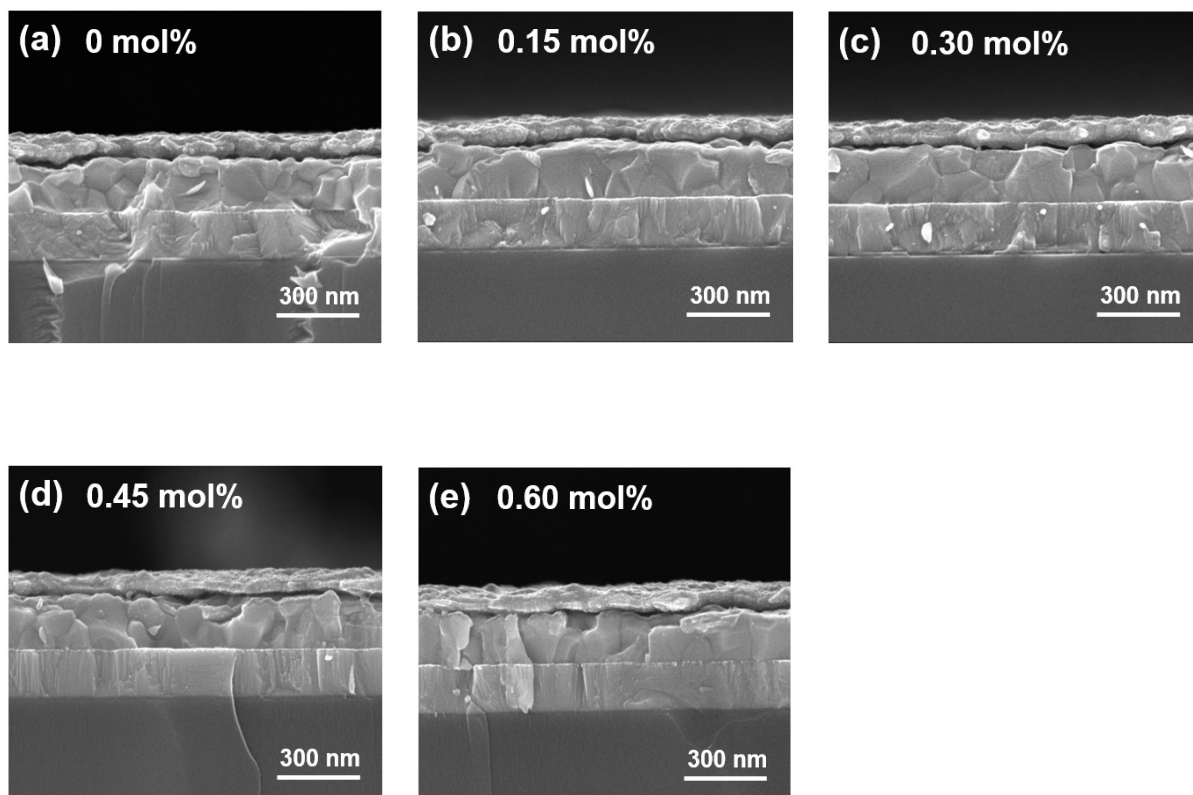

**Fig. S5** Cross-section SEM images of of perovskite films (a) without BMIMBF<sub>4</sub>, and with (b) 0.15 mol%, (c) 0.30 mol%, (d) 0.45 mol%, and (e) 0.60 mol% BMIMBF<sub>4</sub>.



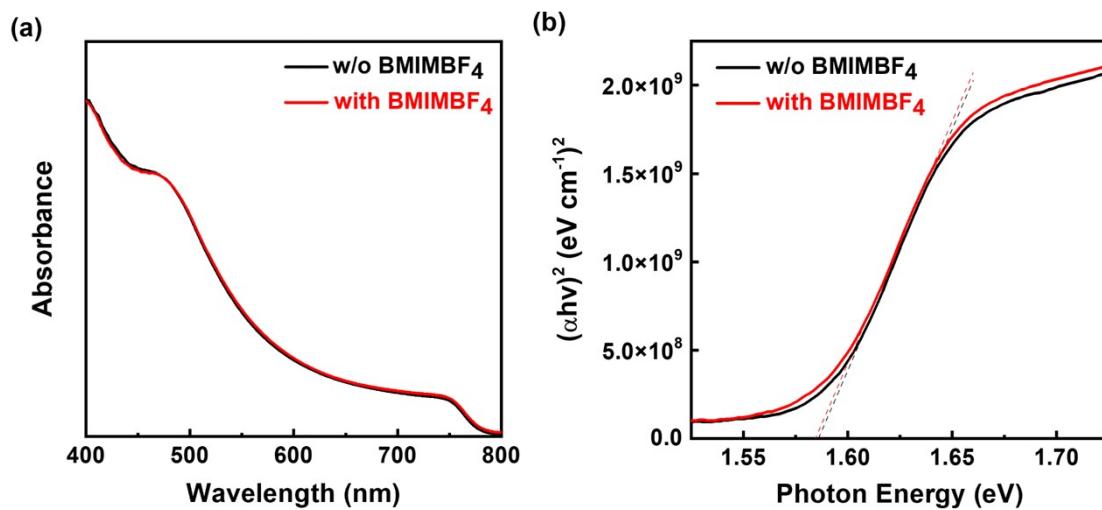

**Fig. S6** (a) UV-Vis absorbance and (b) Tauc plot of the perovskite films with and without BMIMBF<sub>4</sub> additive. The molar concentration of BMIMBF<sub>4</sub> is 0.30 mol% (champion device).

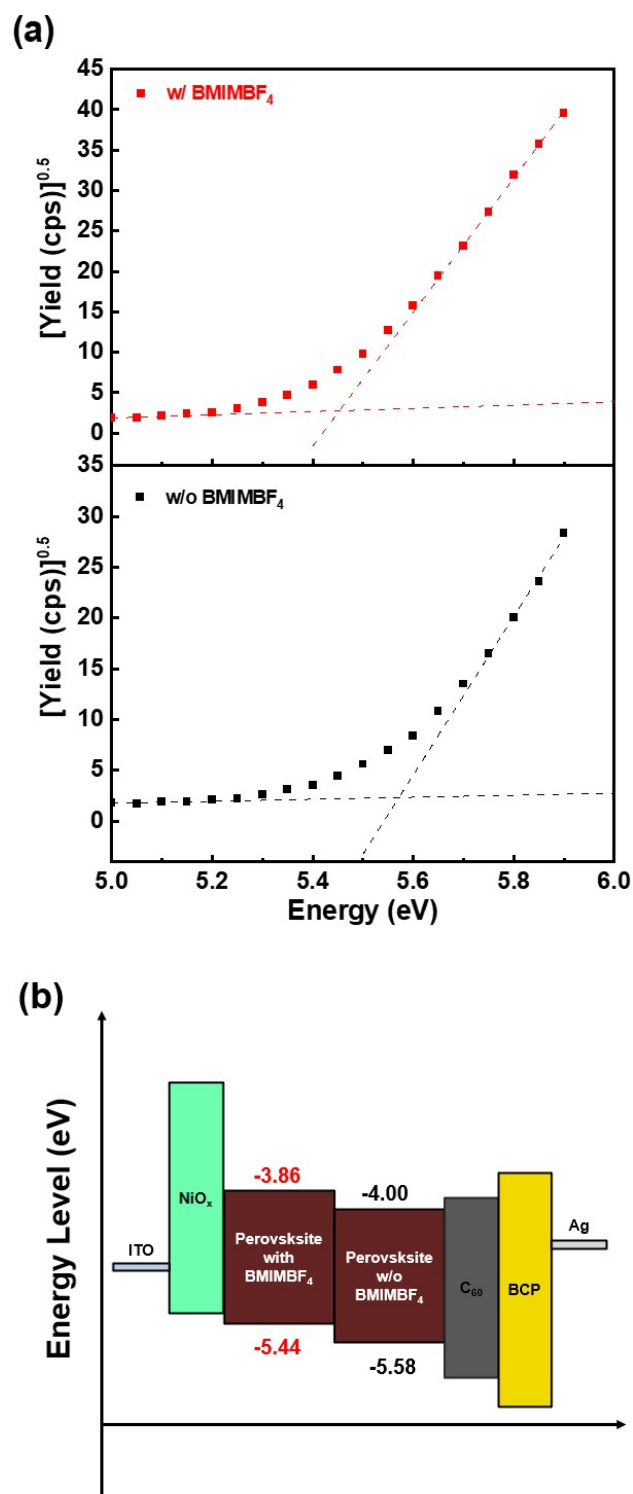

**Fig. S7** (a) PESA of the perovskite films with and without BMIMBF<sub>4</sub> additive. The molar concentration of BMIMBF<sub>4</sub> is 0.30 mol% (champion device). (b) Schematic energy level diagram of the perovskite solar cells with and without BMIMBF<sub>4</sub> additive.



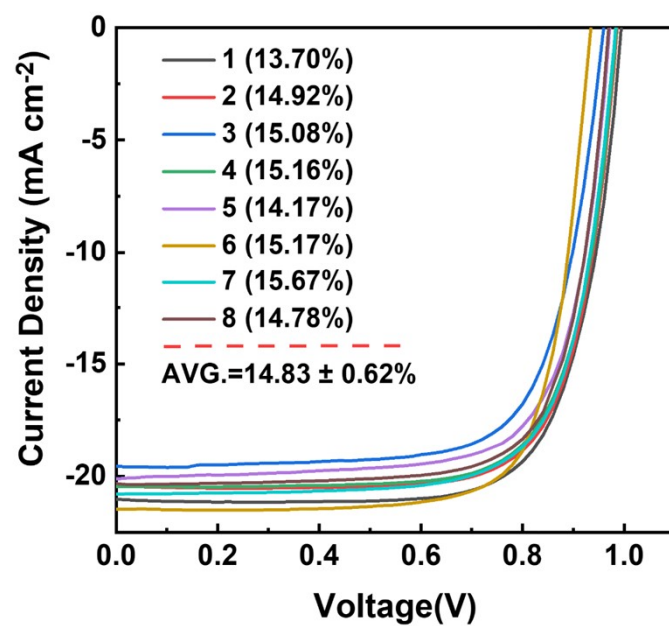

**Fig. S8** *J-V* characteristics associated with the complete device produced from the 8 samples shown in **Fig. 9a**.
